# Supplementary material for: Community and Hospital Factors Associated With Stroke Center Certification in the United States, 2009 to 2017
Source: PubMed Central journal article supplement (PMC6661722; doi:10.1001/jamanetworkopen.2019.7855), 2019-07-26
Supplement: jamanetwopen-2-e197855-s001.pdf [file jamanetwopen-2-e197855-s001.pdf]

## Supplementary Online Content

Shen Y-C, Chen G, Hsia RY. Community and hospital factors associated with stroke center certification in the United States, 2009 to 2017. *JAMA Netw Open*. 2019;2(7):e197855. doi:10.1001/jamanetworkopen.2019.7855

**eTable1.** Stratified Multivariate Hazard Ratios of Hospitals Achieving Stroke Certification by Urban/Rural Status, 2009 to 2017

**eTable2.** Sensitivity Analysis Using Poverty Line

This supplementary material has been provided by the authors to give readers additional information about their work.

**eTable 1. Stratified Multivariate Hazard Ratios of Hospitals Achieving Stroke Certification by Urban/Rural Status, 2009 to 2017**

|                                                   | Rural Hospitals |              | Urban Hospitals |             | No Cardiac Tech Capacity |             | Has Cardiac Tech Capacity |             | Independent Hospitals |             | Member of a System |             |
|---------------------------------------------------|-----------------|--------------|-----------------|-------------|--------------------------|-------------|---------------------------|-------------|-----------------------|-------------|--------------------|-------------|
|                                                   | Hazard ratio    | 95% CI       | Hazard ratio    | 95% CI      | Hazard ratio             | 95% CI      | Hazard ratio              | 95% CI      | Hazard ratio          | 95% CI      | Hazard ratio       | 95% CI      |
| <b>Economic and financial characteristics</b>     |                 |              |                 |             |                          |             |                           |             |                       |             |                    |             |
| HSA family income (ref. grp. = Upper 1/3)         |                 |              |                 |             |                          |             |                           |             |                       |             |                    |             |
| Middle income                                     | 0.86            | [0.43,1.71]  | 0.77**          | [0.68,0.86] | 0.61**                   | [0.46,0.80] | 0.83**                    | [0.74,0.93] | 0.69**                | [0.58,0.83] | 0.83**             | [0.72,0.95] |
| Low income                                        | 0.52            | [0.26,1.05]  | 0.65**          | [0.54,0.77] | 0.49**                   | [0.34,0.72] | 0.67**                    | [0.56,0.80] | 0.50**                | [0.38,0.67] | 0.69**             | [0.57,0.84] |
| Profit Margin (ref. grp. = Upper 1/3)             |                 |              |                 |             |                          |             |                           |             |                       |             |                    |             |
| Middle 1/3                                        | 0.84            | [0.55,1.29]  | 0.96            | [0.88,1.06] | 1.32*                    | [1.02,1.71] | 0.90*                     | [0.81,0.99] | 1.05                  | [0.86,1.27] | 0.93               | [0.84,1.04] |
| Lower 1/3                                         | 0.95            | [0.58,1.54]  | 0.86*           | [0.77,0.97] | 1.15                     | [0.88,1.51] | 0.83**                    | [0.73,0.94] | 0.99                  | [0.79,1.25] | 0.85*              | [0.75,0.97] |
| <b>Hospital Characteristics</b>                   |                 |              |                 |             |                          |             |                           |             |                       |             |                    |             |
| Ownership (ref. grp. = Not-for-profit)            |                 |              |                 |             |                          |             |                           |             |                       |             |                    |             |
| For-profit                                        | 0.90            | [0.53,1.52]  | 0.89            | [0.79,1.00] | 0.86                     | [0.66,1.13] | 0.88                      | [0.78,1.00] | 0.40**                | [0.21,0.77] | 0.92               | [0.81,1.03] |
| Government                                        | 1.03            | [0.58,1.85]  | 0.85*           | [0.72,0.99] | 0.70                     | [0.47,1.04] | 0.87                      | [0.74,1.03] | 0.83                  | [0.68,1.01] | 0.76*              | [0.60,0.97] |
| Designated critical access hospital               | 0.11**          | [0.05,0.24]  | 0.16**          | [0.06,0.43] | 0.14**                   | [0.08,0.27] | 0.00                      | [0.00,0.00] | 0.20**                | [0.09,0.43] | 0.08**             | [0.03,0.19] |
| Total Hospital Beds (ref. grp. = <100 beds)       |                 |              |                 |             |                          |             |                           |             |                       |             |                    |             |
| 100-399 beds                                      | 2.77**          | [1.71,4.51]  | 3.28**          | [2.67,4.02] | 3.30**                   | [2.56,4.27] | 2.60**                    | [1.99,3.39] | 3.43**                | [2.33,5.06] | 2.95**             | [2.39,3.64] |
| 400+ beds                                         | 5.89**          | [2.87,12.08] | 4.61**          | [3.70,5.75] | 6.59**                   | [4.45,9.76] | 3.61**                    | [2.72,4.78] | 5.04**                | [3.27,7.77] | 3.94**             | [3.11,5.00] |
| Teaching hospitals                                | 1.73*           | [1.10,2.71]  | 1.39**          | [1.26,1.53] | 1.67**                   | [1.32,2.12] | 1.34**                    | [1.21,1.48] | 1.50**                | [1.25,1.80] | 1.35**             | [1.20,1.51] |
| Has cardiac capacity (either cath. lab or CABG)   | 1.87*           | [1.13,3.11]  | 1.55**          | [1.34,1.81] |                          |             |                           |             | 2.06**                | [1.52,2.79] | 1.44**             | [1.22,1.69] |
| Hospital is part of a system                      | 1.37            | [0.93,2.02]  | 1.23**          | [1.11,1.36] | 1.94**                   | [1.50,2.50] | 1.09                      | [0.98,1.21] |                       |             |                    |             |
| Case mix index                                    | 6.85**          | [2.98,15.71] | 1.54**          | [1.25,1.91] | 1.86**                   | [1.23,2.83] | 1.61**                    | [1.25,2.09] | 1.97**                | [1.34,2.92] | 1.74**             | [1.35,2.25] |
| <b>Community Characteristics</b>                  |                 |              |                 |             |                          |             |                           |             |                       |             |                    |             |
| Stroke belt states                                | 0.79            | [0.48,1.30]  | 0.71**          | [0.60,0.84] | 0.51**                   | [0.32,0.80] | 0.74**                    | [0.62,0.87] | 0.78                  | [0.59,1.03] | 0.67**             | [0.55,0.82] |
| Has another stroke center within 15-mile radius   | 1.39            | [0.60,3.21]  | 1.32**          | [1.21,1.45] | 1.34*                    | [1.04,1.73] | 1.32**                    | [1.20,1.45] | 1.27**                | [1.07,1.51] | 1.35**             | [1.21,1.50] |
| Percent population in HSA that are >=65 years old | 1.08**          | [1.04,1.13]  | 1.03**          | [1.02,1.04] | 1.09**                   | [1.06,1.12] | 1.02**                    | [1.01,1.03] | 1.03*                 | [1.00,1.05] | 1.03**             | [1.02,1.05] |
| Total population in HSA (log transformed)         | 1.27*           | [1.04,1.55]  | 1.05            | [0.99,1.10] | 1.04                     | [0.94,1.16] | 1.08**                    | [1.03,1.14] | 1.01                  | [0.92,1.10] | 1.09**             | [1.03,1.15] |
| Urban hospitals                                   |                 |              |                 |             | 2.72**                   | [1.88,3.94] | 1.80**                    | [1.41,2.29] | 2.10**                | [1.48,2.98] | 2.11**             | [1.64,2.72] |
| N                                                 | 60852           |              | 43227           |             | 77865                    |             | 26214                     |             | 48583                 |             | 55496              |             |

**eTable 2. Sensitivity Analysis Using Poverty Line**

|                                                  | <b>Hazard ratio</b> | <b>95% CI</b> | <b>Bonferroni-adjusted p-values</b> |
|--------------------------------------------------|---------------------|---------------|-------------------------------------|
| <b>Economic and financial characteristics</b>    |                     |               |                                     |
| HSA poverty level (ref. grp. = Lower 1/3)        |                     |               |                                     |
| Middle 1/3                                       | 0.77**              | [0.69,0.86]   | <0.001                              |
| Upper 1/3                                        | 0.74**              | [0.65,0.84]   | <0.001                              |
| Profit Margin (ref. grp. = Upper 1/3)            |                     |               |                                     |
| Middle 1/3                                       | 0.96                | [0.87,1.06]   | 0.829                               |
| Lower 1/3                                        | 0.88*               | [0.78,0.98]   | 0.049                               |
| <b>Hospital Characteristics</b>                  |                     |               |                                     |
| Ownership (ref. grp. = Not-for-profit)           |                     |               |                                     |
| For-profit                                       | 0.86*               | [0.77,0.97]   | 0.021                               |
| Government                                       | 0.81**              | [0.70,0.95]   | 0.017                               |
| Designated critical access hospital              | 0.13**              | [0.07,0.23]   | <0.001                              |
| Total Hospital Beds (ref. grp. = <100 beds)      |                     |               |                                     |
| 100-399 beds                                     | 3.20**              | [2.65,3.87]   | <0.001                              |
| 400+ beds                                        | 4.41**              | [3.58,5.43]   | <0.001                              |
| Teaching hospitals                               | 1.40**              | [1.28,1.54]   | <0.001                              |
| Has cardiac capacity (either cath. lab or CABG)  | 1.61**              | [1.39,1.87]   | <0.001                              |
| Hospital is part of a system                     | 1.23**              | [1.12,1.37]   | <0.001                              |
| Case mix index                                   | 1.66**              | [1.34,2.05]   | <0.001                              |
| <b>Community Characteristics</b>                 |                     |               |                                     |
| Stroke belt states                               | 0.67**              | [0.57,0.79]   | <0.001                              |
| Has another stroke center within 15-mile radius  | 1.32**              | [1.20,1.45]   | <0.001                              |
| Percent population in HSA that are ≥65 years old | 1.03**              | [1.02,1.04]   | <0.001                              |
| Total population in HSA (log transformed)        | 1.13**              | [1.07,1.18]   | <0.001                              |
| Urban hospitals                                  | 2.26**              | [1.85,2.77]   | <0.001                              |
| N                                                | 104079              |               |                                     |
